# Supplementary material
Source: PubMed Central journal article supplement (PMC8683566)
Supplement: NIHMS1700091-supplement-1.pdf [file NIHMS1700091-supplement-1.pdf]

## Supplemental Materials

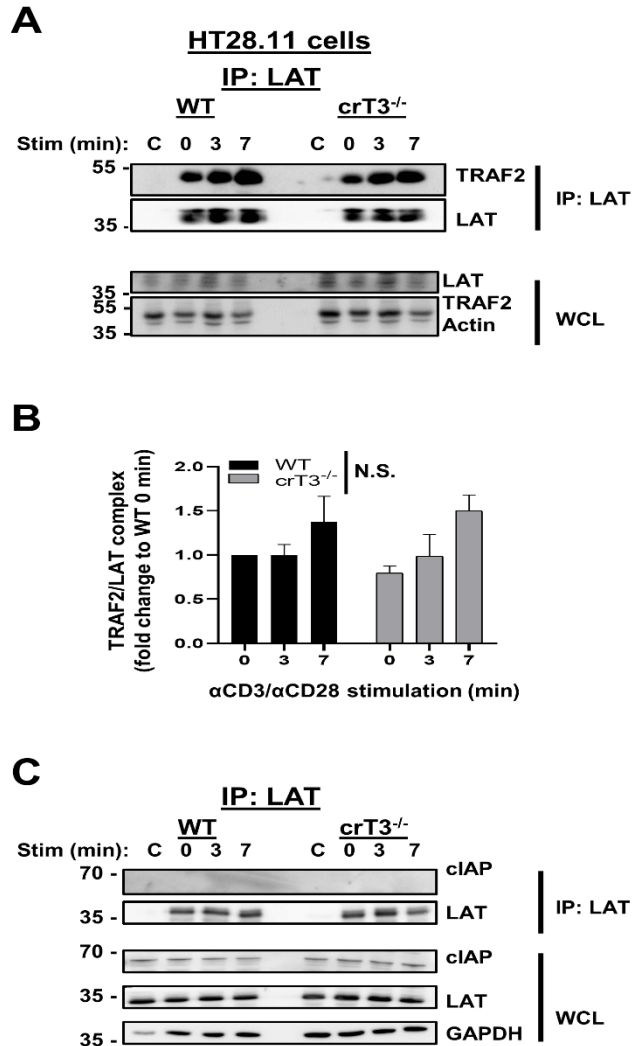

2

### 3 **Supplemental figure 1. Association of TRAF2 with the LAT complex.**

4 A) Human HT28.11 T cells were stimulated through CD3/CD28 for the times indicated and  
 5 lysed, and LAT was immunoprecipitated. Association of TRAF2 with the LAT complex was  
 6 assessed by WB. Blots are representative of 3 independent experiments. B) Densitometric  
 7 analysis of the ratio of TRAF2 associated with the LAT complex at each timepoint shown in A,  
 8 with each timepoint normalized to WT 0 min, to determine the impact of genotype on the  
 9 kinetics of the TRAF2-LAT association. The difference in TRAF2/LAT complex association  
 10 between WT and crT3<sup>-/-</sup> cells was not statistically significant. C) HT28.11 (human) T cells were  
 11 stimulated as in A, and LAT was immunoprecipitated. Association of cIAP1/2 with the LAT  
 12 complex was assessed by WB. Blots are representative of 3 independent experiments. ‘C’  
 13 indicates samples that only received stimulatory Abs, i.e. no IP Abs added after lysis (A, C).  
 14 Graph depicts mean ± SEM. A 2-way ANOVA was performed to establish statistical  
 15 significance in B. The reference group used to calculate fold change was not included in the  
 16 analysis. ‘N.S.’: not significant.

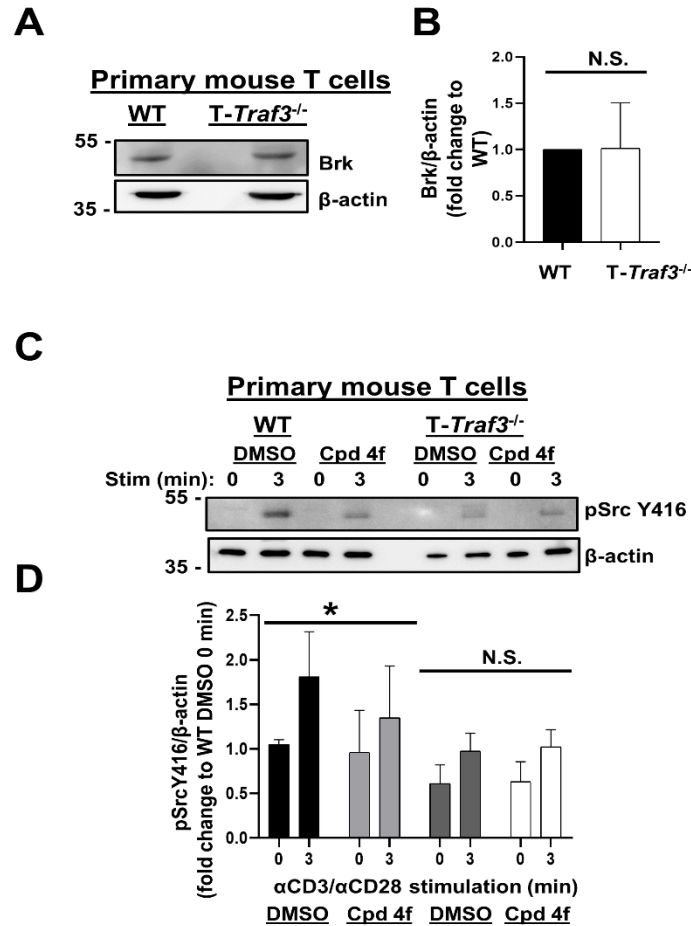

17

18 **Supplemental figure 2. Role of Brk in primary mouse T cells.**

19 Primary mouse T cells were isolated from WT and T-*Traf3*<sup>-/-</sup> mice as described in Materials and  
 20 Methods. A) Expression of Brk in WCL from unstimulated primary mouse T cells was assessed  
 21 by WB. Blots are representative of 3 independent experiments. B) Densitometric analysis of the  
 22 ratio of abundance of Brk to that of β-actin, with the ratio of Brk to β-actin in WT T cells set as  
 23 1. The difference in Brk expression between WT and T-*Traf3*<sup>-/-</sup> cells was not statistically  
 24 significant by unpaired t-test. C) WT and T-*Traf3*<sup>-/-</sup> primary mouse T cells were treated with  
 25 DMSO or the Brk inhibitor Cpd 4f for 2 hours, as described in Materials and Methods, then  
 26 stimulated through CD3/CD28 for the times indicated and lysed. Phosphorylation of Fyn at Y<sup>416</sup>  
 27 and Src at Y<sup>394</sup> was detected by WB with an anti-pSrcY<sup>416</sup> Ab. Blots are representative of 4 independent  
 28 experiments. D) Densitometric analysis of the ratio of abundance of pSrc Y<sup>416</sup> to that of β-actin. Fold  
 29 change was calculated by dividing the ratio of pSrc Y<sup>416</sup>/β-actin in each lane to the ratio of pSrc Y<sup>416</sup>/β-  
 30 actin for DMSO-treated WT 0 min, to determine the impact of Cpd 4f treatment on Src kinase  
 31 activation relative to a baseline value. The difference between DMSO-treated and Cpd 4f-treated WT  
 32 cells was statistically significant (\*p=0.0177). The difference between DMSO-treated and Cpd 4f-treated  
 33 T-*Traf3*<sup>-/-</sup> cells was not statistically significant. Graphs depict mean ± SEM. A 2-way ANOVA was  
 34 performed to establish statistical significance in C. The reference group used to calculate fold  
 35 change was not included in the analysis. \*: p<0.05; ‘N.S.’: not significant.

**A**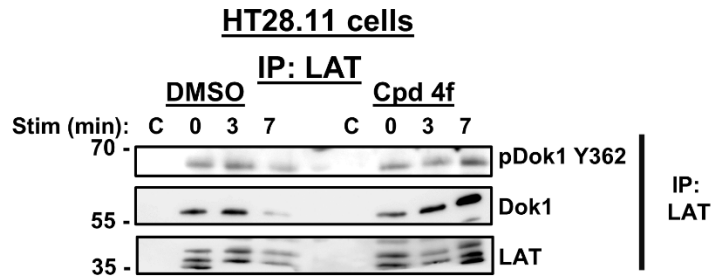**B**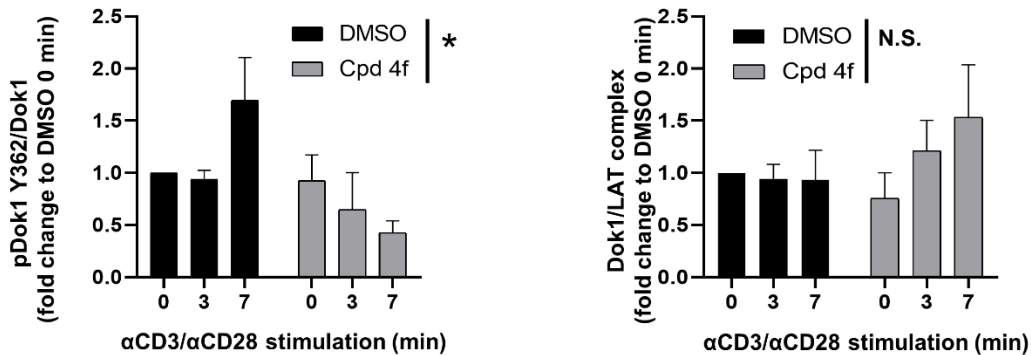

36

37 **Supplemental figure 3. Impact of Brk inhibition on activity of Dok1 associated with the**  
 38 **LAT complex.**

39 A) Human HT28.11 WT T cells were treated with DMSO or the Brk inhibitor Cpd 4f for 2 hours  
 40 as described in Materials and Methods, then stimulated through CD3/CD28 for the times  
 41 indicated and lysed. LAT was immunoprecipitated, and association of pDok1 Y<sup>362</sup> and total  
 42 Dok1 with the LAT complex was assessed by WB. Blots are representative of 4 independent  
 43 experiments. B) Densitometric analysis of the ratio of pDok1 Y<sup>362</sup> associated with Dok1 (left)  
 44 and the ratio of Dok1 associated with the LAT complex (right) at each timepoint shown in A,  
 45 with each timepoint normalized to DMSO 0 min. The difference in pDok1 Y<sup>362</sup>/Dok1 association  
 46 between DMSO-treated and Cpd 4f-treated WT cells over time was statistically significant  
 47 (\*p=0.0177). The difference in Dok1/LAT complex association between DMSO-treated and Cpd  
 48 4f-treated cells was not statistically significant. \* in IP indicates a band from the molecular  
 49 weight (MW) ladder loaded in that lane. 'C' indicates samples that only received stimulatory  
 50 Abs (A). Graph depicts mean ± SEM. A 2-way ANOVA was performed to establish statistical  
 51 significance in B. The reference group used to calculate fold change was not included in the  
 52 analysis. \*: p<0.05; 'N.S.': not significant.

53

54

55

56

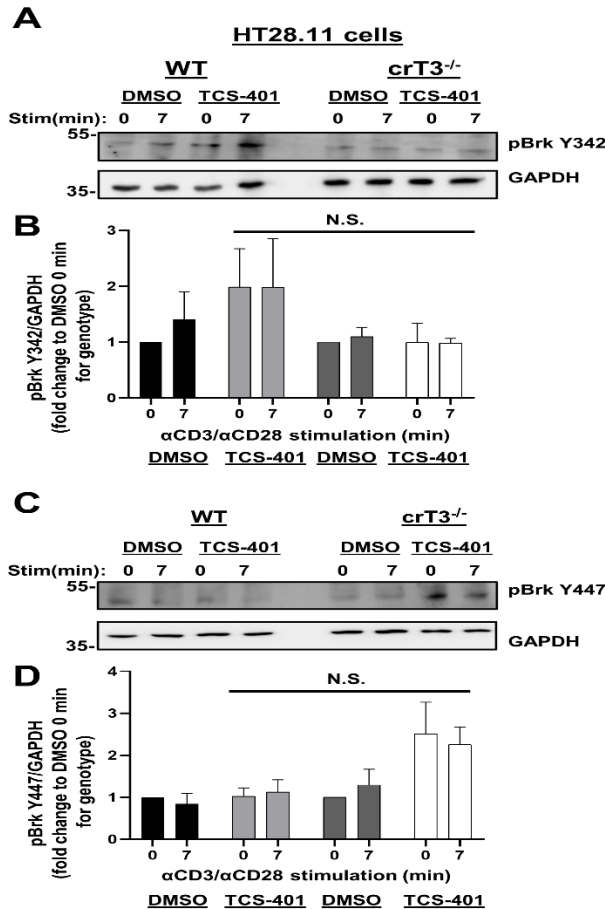

57

58

**Supplemental figure 4. Impact of PTP1B inhibition on phosphorylation of Brk.**

59 A) Human HT28.11 WT and crTRAF3<sup>-/-</sup> T cells were treated with DMSO or the PTP1B inhibitor  
60 TCS-401 for 2 hours as described in Materials and Methods, then stimulated through CD3/CD28  
61 for the times indicated and lysed. Phosphorylation of Brk at Y<sup>342</sup> was assessed by WB. Blots are  
62 representative of 3 independent experiments. B) Densitometric analysis of the ratio of abundance  
63 of pBrkY<sup>342</sup> to that of GAPDH in each lane. Fold change was calculated by dividing the ratio of  
64 pBrkY<sup>342</sup>/GAPDH at each timepoint by the ratio of pBrk Y<sup>342</sup>/GAPDH at the DMSO 0 min  
65 timepoint for each cell line, to control for cell line-specific differences in abundance of pBrk  
66 Y<sup>342</sup>. The difference in pBrk Y<sup>342</sup> abundance between WT and crTRAF3<sup>-/-</sup> cells treated with Cpd  
67 4f was not statistically significant. C) Human HT28.11 WT and crTRAF3<sup>-/-</sup> T cells were treated  
68 as described in Supp. Fig. 4A. Phosphorylation of Brk at Y<sup>447</sup> was assessed by WB. Blots are  
69 representative of 4 independent experiments. D) Densitometric analysis of the ratio of abundance  
70 of pBrkY<sup>447</sup> to that of GAPDH in each lane. Fold change was calculated by dividing the ratio of  
71 pBrkY<sup>447</sup>/GAPDH at each timepoint by the ratio of pBrk Y<sup>447</sup>/GAPDH at the DMSO 0 min  
72 timepoint for each cell line, to control for cell line-specific differences in abundance of pBrk  
73 Y<sup>447</sup>. The difference in pBrk Y<sup>447</sup> abundance between WT and crTRAF3<sup>-/-</sup> cells treated with  
74 TCS-401 was trending toward statistical significance (p=0.0677). Graphs depict mean ± SEM. A  
75 2-way ANOVA was performed to establish statistical significance in B and D. The reference  
76 group used to calculate fold change was not included in the analysis. ‘N.S.’: not significant.
